# Supplementary material for: Asymmetric 1,8/13,2,x-M2C2B1014-vertex metallacarboranes by direct electrophilic insertion reactions; the VCD and BHD methods in critical analysis of cage C atom positions
Source: Royal Society of Chemistry journal article supplement (doi:10.1039/c3dt52101j), 2013-10-08
Supplement: c3dt52101j.pdf [file c3dt52101j.pdf]

**Asymmetric 1,8/13,2,x-M<sub>2</sub>C<sub>2</sub>B<sub>10</sub> 14-vertex metallocarboranes by direct electrophilic insertion reactions; the VCD and BHD methods in critical analysis of cage C atom positions**

Amelia McAnaw, Maria Elena Lopez, David Ellis, Georgina M. Rosair and Alan J. Welch

**Electronic Supplementary Information**

**Table S1** Crystallographic data for compound **6** (original and redetermination)

|                                                                       | <b>6</b> (original)                                             | <b>6</b> (redetermination)                                      |
|-----------------------------------------------------------------------|-----------------------------------------------------------------|-----------------------------------------------------------------|
| Formula                                                               | C <sub>12</sub> H <sub>22</sub> B <sub>10</sub> Co <sub>2</sub> | C <sub>12</sub> H <sub>22</sub> B <sub>10</sub> Co <sub>2</sub> |
| <i>M</i>                                                              | 392.26                                                          | 392.26                                                          |
| Crystal system                                                        | orthorhombic                                                    | orthorhombic                                                    |
| Space group                                                           | <i>Pbca</i>                                                     | <i>Pbca</i>                                                     |
| <i>a</i> / Å                                                          | 14.807(3)                                                       | 14.8157(18)                                                     |
| <i>b</i> / Å                                                          | 13.264(3)                                                       | 13.3179(18)                                                     |
| <i>c</i> / Å                                                          | 16.769(3)                                                       | 16.818(2)                                                       |
| $\alpha$ (°)                                                          |                                                                 |                                                                 |
| $\beta$ (°)                                                           |                                                                 |                                                                 |
| $\gamma$ (°)                                                          |                                                                 |                                                                 |
| <i>U</i> / Å <sup>3</sup>                                             | 3293.4(12)                                                      | 3318.4(8)                                                       |
| <i>Z</i>                                                              | 8                                                               | 8                                                               |
| <i>F</i> (000) / e                                                    | 1584                                                            | 1584                                                            |
| <i>D</i> <sub>calc</sub> / Mg m <sup>-3</sup>                         | 1.582                                                           | 1.570                                                           |
| $\mu$ (Mo-K $\alpha$ ) / mm <sup>-1</sup>                             | 2.001                                                           | 1.986                                                           |
| $\theta$ <sub>max</sub> (°)                                           | 22.27                                                           | 35.17                                                           |
| Data measured                                                         | 29332                                                           | 98827                                                           |
| Unique data                                                           | 2036                                                            | 7274                                                            |
| Data $\geq 2\sigma$ (I)                                               | 1103                                                            | 6076                                                            |
| <i>R</i> <sub>int</sub>                                               | 0.2121                                                          | 0.0424                                                          |
| <i>R</i> , w <i>R</i> <sub>2</sub> (obs. data)                        | 0.0560, 0.1312                                                  | 0.0323, 0.0791                                                  |
| <i>S</i>                                                              | 1.048                                                           | 1.024                                                           |
| Variables                                                             | 253                                                             | 253                                                             |
| <i>E</i> <sub>max</sub> , <i>E</i> <sub>min</sub> / e Å <sup>-3</sup> | 1.122, -1.202                                                   | 0.906, -1.190                                                   |

**Table S2** Vertex-to-Centroid distances (Å) in compound **6**<sup>a</sup>

| Vertex | <b>6</b> (original) |     | <b>6</b> (redetermination) |     |
|--------|---------------------|-----|----------------------------|-----|
| 1      | 2.035(5)            | Co1 | 2.0307(8)                  | Co1 |
| 2      | <u>1.776(15)</u>    | C2  | <u>1.8084(17)</u>          | C2  |
| 3      | 1.867(15)           | B7  | 1.9005(19)                 | B7  |
| 4      | 1.900(18)           | B6  | 1.917(2)                   | B6  |
| 5      | <u>1.764(17)</u>    | C5  | <u>1.797(3)</u>            | C5  |
| 6      | 1.896(15)           | B4  | 1.9021(18)                 | B4  |
| 7      | 1.914(14)           | B3  | 1.9220(18)                 | B3  |
| 8      | 1.857(14)           | B13 | 1.8809(18)                 | B13 |
| 9      | 1.819(16)           | B12 | 1.859(2)                   | B12 |
| 10     | 1.822(18)           | B11 | 1.900(2)                   | B11 |
| 11     | 1.842(15)           | B10 | 1.877(2)                   | B10 |
| 12     | 1.893(16)           | B9  | 1.909(2)                   | B9  |
| 13     | 2.359(6)            | Co8 | 2.3723(8)                  | Co8 |
| 14     | 1.603(15)           | B14 | 1.5851(18)                 | B14 |

<sup>a</sup> Vertex numbers (left column) refer to the model before the C atoms were assigned; underlined entries identify C vertices; atom labels to the right of each entry are the final atom identifiers, shown in Figs. 2-7.

### Conclusion

Even for the original determination the two VCDs from C atoms are measurably shorter than all VCDs from B atoms. Taking the longer VCD(C), 1.776(15) Å, and the shortest VCD(B), 1.819(16) Å, the difference, 0.043 Å, is ca.  $2\sigma$  (where  $\sigma = [\sigma_1^2 + \sigma_2^2]^{0.5} = 0.022$  Å).

**Table S3** Vertex–H distances (Å) in compound **6**<sup>a</sup>

| Vertex | <b>6</b> (original) |          | <b>6</b> (redetermination) |         |
|--------|---------------------|----------|----------------------------|---------|
| 2      | <u>0.47(12)</u>     | 0.78(10) | <u>0.30(3)</u>             | 0.99(2) |
| 3      | 1.26(10)            | 1.18(10) | 1.13(2)                    | 1.11(2) |
| 4      | 1.27(10)            | 1.30(10) | 1.13(2)                    | 1.11(2) |
| 5      | <u>0.53(13)</u>     | 1.05(12) | <u>0.17(3)</u>             | 1.03(2) |
| 6      | 1.00(11)            | 0.99(11) | 1.06(2)                    | 1.06(2) |
| 7      | 1.17(10)            | 1.13(10) | 1.12(2)                    | 1.12(2) |
| 8      | 1.07(10)            | 1.04(10) | 1.07(2)                    | 1.07(2) |
| 9      | 1.23(11)            | 1.21(11) | 1.07(2)                    | 1.08(2) |
| 10     | 0.90(13)            | 0.96(12) | 1.08(3)                    | 1.07(2) |
| 11     | 1.07(11)            | 1.05(11) | 1.07(2)                    | 1.08(2) |
| 12     | 1.16(10)            | 1.17(10) | 1.10(2)                    | 1.12(2) |
| 14     | 0.79(11)            | 0.80(10) | 1.08(2)                    | 1.08(2) |

<sup>a</sup> For each structure the left hand entry is the vertex–H distance for the “all-B” model (where all non-metal vertices are assigned as B atoms); underlined entries identify C vertices. The right hand entry is the vertex–H distance following assignment of the cage C atoms.

### Conclusion

Even for the original determination the two BHDs from C atoms are measurably shorter than all BHDs from B atoms. Taking the longer BHD(C), 0.53(13) Å, and the shortest VCD(B) excluding vertex 14 (which is exceedingly unlikely to be a C atom because it is of degree-6, see manuscript), 0.90(13) Å, the difference, 0.37 Å, is ca.  $2\sigma$  (where  $\sigma = [\sigma_1^2 + \sigma_2^2]^{0.5} = 0.18$  Å).

**Table S4**  $U_{\text{eq}}$  values ( $\text{\AA}^2$ ) for non-metal vertices refined as B in compound **6**<sup>a</sup>

| Vertex | <b>6</b> (original) | <b>6</b> (redetermination) |
|--------|---------------------|----------------------------|
| 2      | <u>0.019(4)</u>     | <u>0.0096(3)</u>           |
| 3      | <i>0.041(4)</i>     | <i>0.0166(3)</i>           |
| 4      | 0.050(4)            | 0.0206(3)                  |
| 5      | <u>0.042(5)</u>     | <u>0.0185(3)</u>           |
| 6      | 0.048(4)            | 0.0192(3)                  |
| 7      | <i>0.033(3)</i>     | <i>0.0151(3)</i>           |
| 8      | <i>0.032(3)</i>     | <i>0.0155(3)</i>           |
| 9      | 0.050(4)            | 0.0200(3)                  |
| 10     | 0.070(5)            | 0.0241(4)                  |
| 11     | 0.051(4)            | 0.0223(3)                  |
| 12     | 0.045(4)            | 0.0188(3)                  |
| 14     | <i>0.042(4)</i>     | <i>0.0169(3)</i>           |

<sup>a</sup> Vertex numbers (left column) refer to the model before the C atoms were assigned; underlined entries indicate C vertices identified by the VCD and BHD methods. *Italicised* entries show  $U_{\text{eq}}$  values for genuine B atoms that are  $\leq$  those of atoms which are actually C.

### Conclusion

Even though the  $U_{\text{eq}}$  values for the same vertex atom are all reduced and the e.s.d.s on these values are an order of magnitude smaller in the redetermination, the basic conclusion from analysis of the  $U_{\text{eq}}$  values is exactly the same for the original determination as for the redetermination – whilst the lowest  $U_{\text{eq}}$  is for vertex 2 (which is a C atom) the second lowest  $U_{\text{eq}}$  is not for vertex 5 (the other C atom).  $U_{\text{eq}}$  values for vertices 3, 7, 8 and 14 are all at least as small as that for vertex 5.

### Overall Conclusion from Tables S2-S4

The VCD and BHD methods work perfectly well in identifying cage C atoms even if the overall crystallographic data is relatively imprecise. Equally, the  $U_{\text{eq}}$  method is as poor a method for identifying cage C atoms using very precise crystallographic data as it is when the data is less precise.

**Table S5** Intermolecular contact distances (Å) of potential significance in compounds **1-6**

| Compound | Atom A | Atom B | Symmetry operation B                | Distance | Type of contact   |
|----------|--------|--------|-------------------------------------|----------|-------------------|
| <b>1</b> | H2     | H10    | $1+x, +y, +z$                       | 2.165    | dihydrogen        |
| <b>3</b> | H2C    | H14C   | $\frac{1}{2}-x, -\frac{1}{2}+y, z$  | 2.181    | dihydrogen        |
| <b>4</b> | C84    | C85    | $2-x, 1-y, 1-z$                     | 3.172    | Cp $\pi$ stacking |
| <b>4</b> | H2     | H11    | $1+x, +y, +z$                       | 2.218    | dihydrogen        |
| <b>5</b> | H2     | H10    | $1+x, +y, +z$                       | 2.165    | dihydrogen        |
| <b>5</b> | H4     | H6     | $-x, -\frac{1}{2}+y, -z$            | 2.289    | dihydrogen        |
| <b>6</b> | H2     | H14    | $\frac{1}{2}-x, -\frac{1}{2}+y, z$  | 2.217    | dihydrogen        |
| <b>6</b> | H14A   | C83    | $\frac{1}{2}-x, -y, -\frac{1}{2}+z$ | 2.589    | H(Cp)...C(Cp)     |

Although in the crystal structure of compound **2** the CH unit at  $\frac{1}{2}-x, -\frac{1}{2}+y, \frac{1}{2}-z$  appears to be directed towards O31 the O...H distance is 2.857 Å, greater than the sum of the van der Waals radii for these atoms.
